# Supplementary material
Source: MDPI journal article supplement (https://www.mdpi.com/2076-0760/12/12/680)
Supplement: s1 [file s1 › socsci-2724687-supplementary.pdf]

(Table S1)

**ENTREPRENEURSHIP POTENTIAL TEST (ATE-S)**

Below you will find the ATE-S test that measures entrepreneurial potential. Please answer all questions as honestly as possible. There are no wrong answers and you answer by ticking the box you think is the most appropriate.

0 = *completely disagree* up to 7 = *completely agree*

|    |                                                                                       | 1 | 2 | 3 | 4 | 5 | 6 | 7 |
|----|---------------------------------------------------------------------------------------|---|---|---|---|---|---|---|
| 1  | I think I show a lot of imagination in my schoolwork.                                 |   |   |   |   |   |   |   |
| 2  | I am good at getting people to work in groups.                                        |   |   |   |   |   |   |   |
| 3  | Making mistakes is a good way to learn.                                               |   |   |   |   |   |   |   |
| 4  | I work very hard to achieve success in my projects.                                   |   |   |   |   |   |   |   |
| 5  | I believe that my future professional success depends to a large extent on what I do. |   |   |   |   |   |   |   |
| 6  | I like classes that make me develop my imagination.                                   |   |   |   |   |   |   |   |
| 7  | I am good at motivating my classmates.                                                |   |   |   |   |   |   |   |
| 8  | I try to find different solutions to a problem before I give up.                      |   |   |   |   |   |   |   |
| 9  | It is worth the effort to work hard on projects.                                      |   |   |   |   |   |   |   |
| 10 | I am worried that I will not succeed in my future professional life.                  |   |   |   |   |   |   |   |
| 11 | I find that a good imagination helps <u>me</u> to function better in school.          |   |   |   |   |   |   |   |
| 12 | I think I can convince my classmates to agree on a plan.                              |   |   |   |   |   |   |   |
| 13 | My intuition helps me to solve problems as they arise.                                |   |   |   |   |   |   |   |
| 14 | I feel great when a class project goes well.                                          |   |   |   |   |   |   |   |
| 15 | I have as much chance as anyone else of getting a good job in the future.             |   |   |   |   |   |   |   |
| 16 | I enjoy classes where the teachers do different things.                               |   |   |   |   |   |   |   |
| 17 | I take responsibility for organising my colleagues when we work in a group.           |   |   |   |   |   |   |   |
| 18 | I trust my own intuition to solve problems in class.                                  |   |   |   |   |   |   |   |
| 19 | I am proud of my work this academic year.                                             |   |   |   |   |   |   |   |
| 20 | I think it is important to plan my professional future.                               |   |   |   |   |   |   |   |
| 21 | It is important to finish a project to the best of your ability.                      |   |   |   |   |   |   |   |
| 22 | I am confident in my ability to succeed in my professional future.                    |   |   |   |   |   |   |   |
